# Supplementary material for: Regulation of multi-color fluorescence of carbonized polymer dots by multiple contributions of effective conjugate size, surface state, and molecular fluorescence
Source: Royal Society of Chemistry journal article supplement (doi:10.1039/d2tb01330d), 2022-01-01
Supplement: d2tb01330d1.pdf [file d2tb01330d1.pdf]

## Supporting information

### **Regulation of multi-color fluorescence of carbonized polymer dots by multiple contributions of effective conjugate size, surface state, and molecular fluorescence**

*Jiafeng Wan<sup>a †</sup>, Xin Zhang<sup>a †</sup>, Ya Jiang<sup>a</sup>, Shiqing Xu<sup>b</sup>, Jing Li<sup>c</sup>, Mengliu Yu<sup>c</sup>, Kai Zhang<sup>c\*</sup> and Zhiqiang Su<sup>a\*</sup>*

*<sup>a</sup> State Key Laboratory of Chemical Resource Engineering, Beijing Key Laboratory of Advanced Functional Polymer Composites, Beijing University of Chemical Technology, Beijing 100029, China.*

*<sup>b</sup> Institute of Clinical Medical Sciences, China-Japan Friendship Hospital, Beijing 100029, China.*

*<sup>c</sup> Dental Medical Center, China-Japan Friendship Hospital, Beijing 100029, China.*

*<sup>†</sup> The authors contribute equally in this work.*

\*Corresponding author. E-mail: [suzq@mail.buct.edu.cn](mailto:suzq@mail.buct.edu.cn) (Z. Su);

E-mail: [zkzryhyy@126.com](mailto:zkzryhyy@126.com) (K. Zhang);

**Table S1.** CDs prepared under different conditions

| Time of reaction     | 6 h    |        |        | 10 h   |
|----------------------|--------|--------|--------|--------|
| Temperature          | 120 °C | 160 °C | 200 °C | 160 °C |
| Solvent              |        |        |        |        |
| H <sub>2</sub> O     | CDs-1  | CDs-4  | CDs-7  | CDs-10 |
| DMF                  | CDs-2  | CDs-5  | CDs-8  | CDs-11 |
| DMF+HNO <sub>3</sub> | CDs-3  | CDs-6  | CDs-9  | CDs-12 |

**Table S2.** Elemental content at different CDs.

|        | C     | N     | O     |
|--------|-------|-------|-------|
| CDs-1  | 50.34 | 11.73 | 37.92 |
| CDs-2  | 63    | 12.53 | 24.47 |
| CDs-3  | 62.73 | 12.56 | 24.71 |
| CDs-4  | 62.62 | 8.22  | 29.16 |
| CDs-5  | 62.64 | 15.22 | 22.14 |
| CDs-6  | 63.46 | 15.41 | 21.13 |
| CDs-7  | 70.41 | 7.41  | 22.18 |
| CDs-8  | 64.59 | 17.91 | 17.49 |
| CDs-9  | 62.38 | 19.76 | 17.85 |
| CDs-10 | 58.51 | 11.53 | 29.96 |
| CDs-11 | 60.28 | 17.79 | 21.93 |
| CDs-12 | 61.97 | 17.35 | 20.69 |

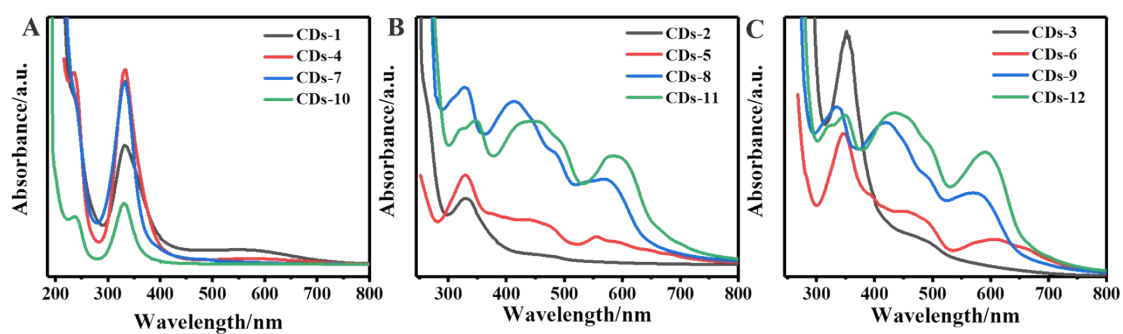**Figure S1.** UV-vis spectra of CDs synthesized with the same reaction solvent and different reaction temperatures and reaction times: (A) H<sub>2</sub>O; (B) DMF; (C) DMF+HNO<sub>3</sub>.

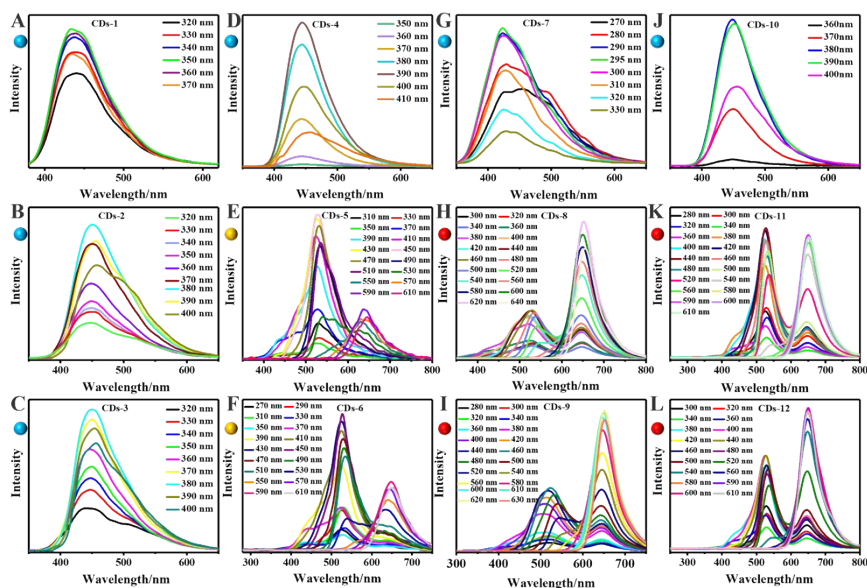

**Figure S2.** The 2D fluorescence emission spectra of A) CDs-1, B) CDs-2, C) CDs-3, D) CDs-4, E) CDs-5, F) CDs-6, G) CDs-7, H) CDs-8, I) CDs-9, J) CDs-10, K) CDs-11 and L) CDs-12.

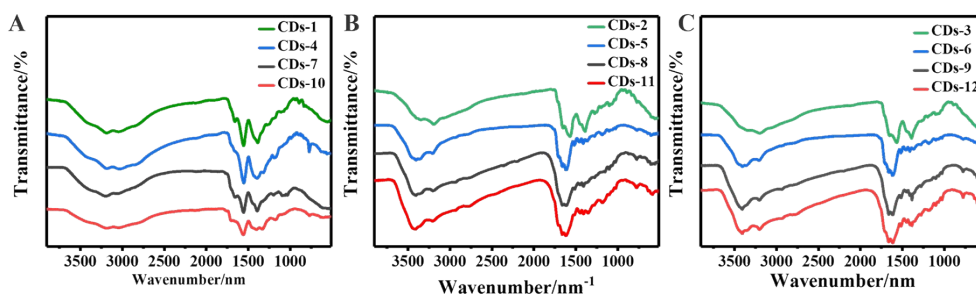

**Figure S3.** The FTIR spectrum of CDs synthesized with the same reaction solvent and different reaction temperatures and reaction times: (A) H<sub>2</sub>O; (B) DMF; (C) DMF, HNO<sub>3</sub>.

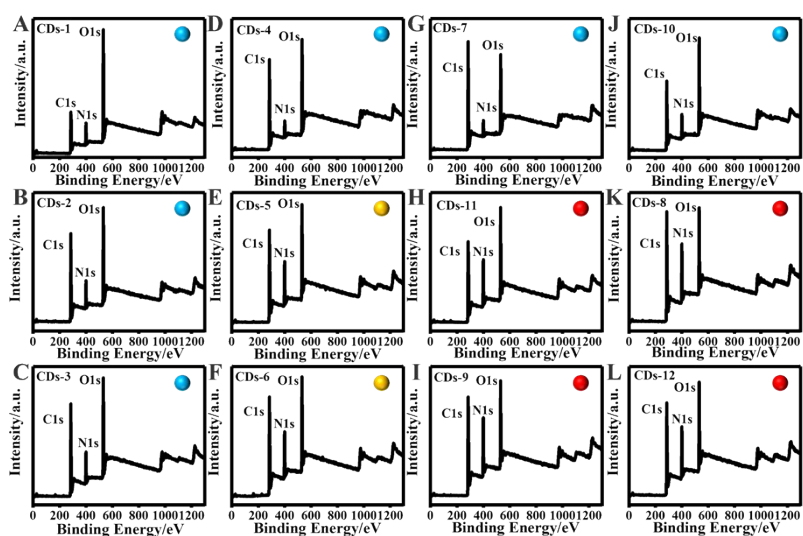

**Figure S4.** XPS spectra (full survey) of A) CDs-1, B) CDs-2, C) CDs-3, D) CDs-4, E) CDs-5, F) CDs-6, G) CDs-7, H) CDs-8, I) CDs-9, J) CDs-10, K) CDs-11 and L) CDs-12.

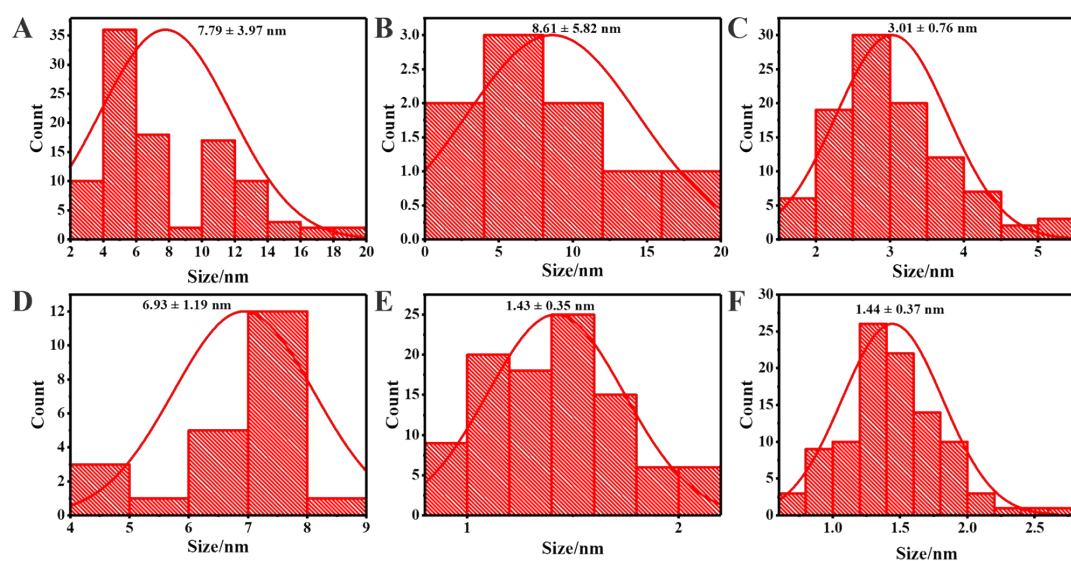

**Figure S5.** The size of (A) CDs-2, (B) CDs-10, (C) CDs-5, (D) CDs-6, (E) CDs-11 and (F) CDs-12.

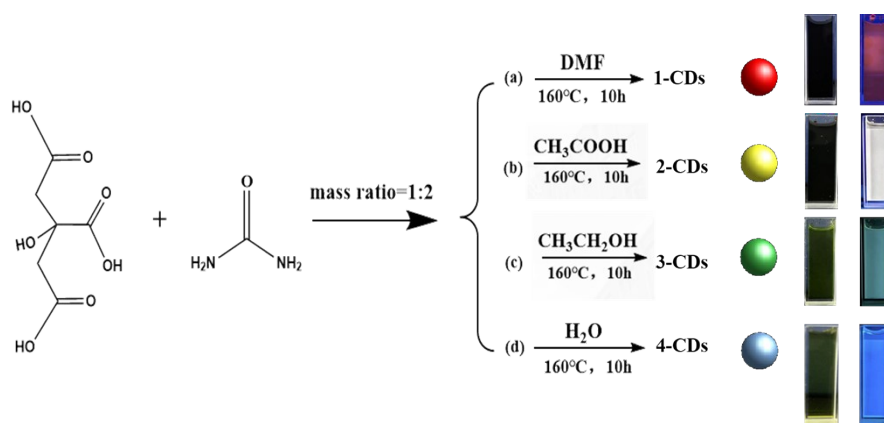

**Figure S6.** Multicolor fluorescent CPDs synthesized in different solvents.

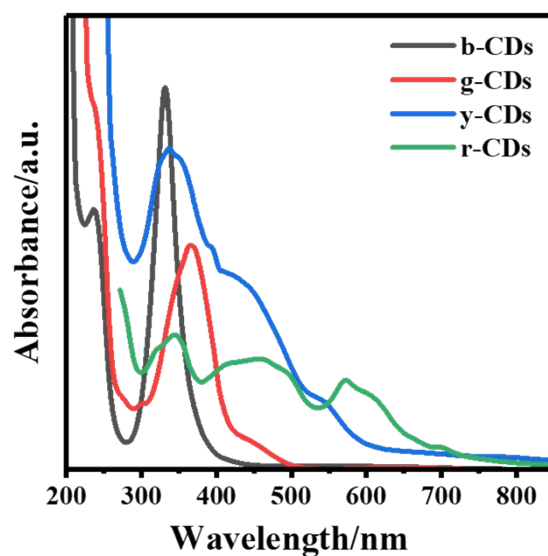

**Figure S7.** UV-vis spectra of Multicolor fluorescent CPDs.

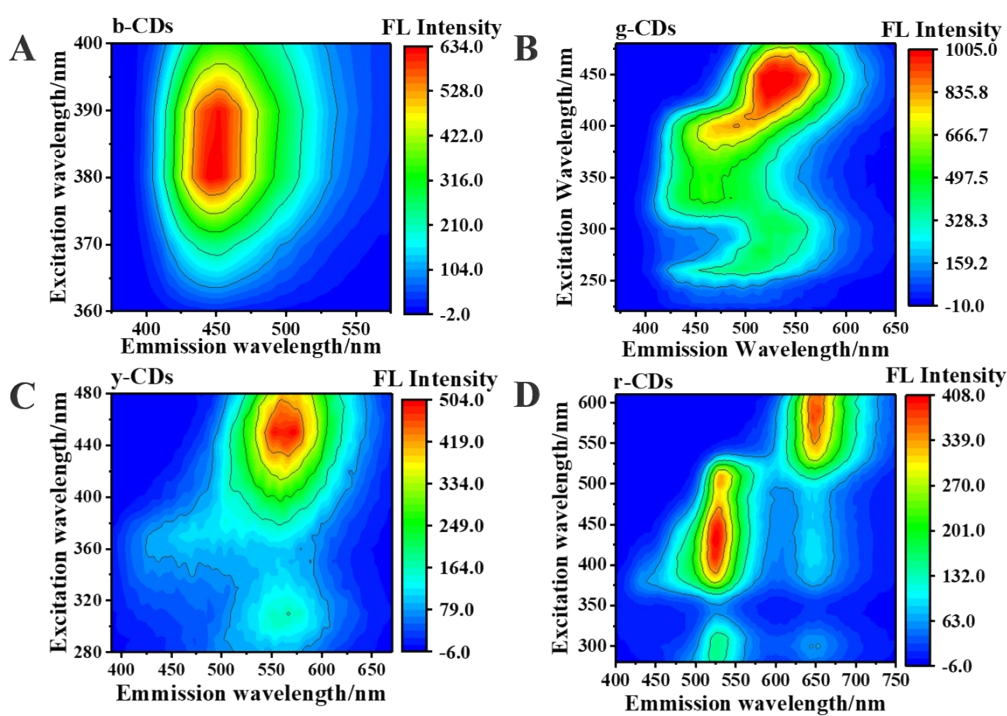

**Figure S8.** The luminescence emission spectra of Multicolor fluorescent CPDs: A) DMF; B)  $\text{CH}_3\text{COOH}$ ; C)  $\text{CH}_3\text{CH}_2\text{OH}$ ; D)  $\text{H}_2\text{O}$ .

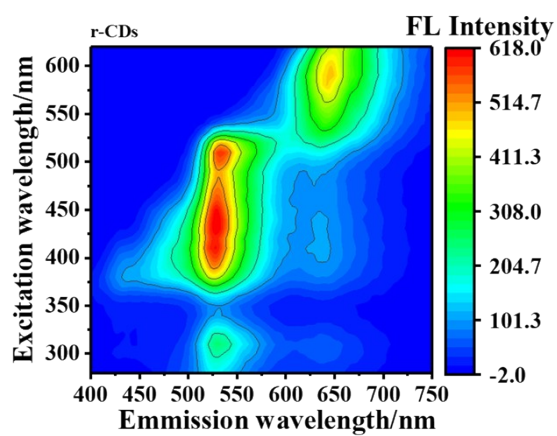

**Figure S9.** The luminescence emission spectra of r-CD (after two weeks).
